# Supplementary material for: Applicability of Precision Medicine Approaches to Managing Hypertension in Rural Populations
Source: Preprints.org preprint supplement (doi:10.20944/preprints201801.0111.v1), 2018-01-12
Supplement: Supplementary file 1 [file supplementary]

## Sheet: Supplemental Table 1
Ancesral group	State	Low Call Rate (CR)	No variation	Better CR	Better CR-HWE viol	High CR	High CR-HWE viol	Autosomal SNPs of higher quality	Total autosomal SNPs
AA	Pre	278	174925	805	71	756526	186	757331	932791
AA	Post	96	172528	293	70	759556	248	759849	932791
CAU	Pre	339	223929	779	55	707550	139	708329	932791
CAU	Post	130	223357	458	75	708615	156	709073	932791
All	Pre	231	151856	666	44	779595	399	780261	932791
All	Post	75	149130	209	49	782845	483	783054	932791

## Sheet: Supplemental Table 2
Loci information	CAAPA vs 1kG	HRC vs 1kG
Total loci	45639158	90558388
Overlapping loci	24880301	49826569
Percent overlap	0.545152	0.550214
1kG-only loci	9363544	15148191
Ref-only loci	8461186	22649501

## Sheet: Supplemental Table 3
Targets prepared for:	AA	CAU
Beagle	730616	726165
Minimac	698343	660733

## Sheet: Supplemental Table 4
	AA	CAU	p
Demographics
Number of participants	58	22
*Age at enrollment, mean (range)	54.53 (28 − 79)	60.52 (38 − 78)	0.0161
**Male sex, N (%)	3 (5.17)	7 (31.82)	0.0035
**Education: HS or less, N (%)	29 (50.00)	3 (13.64)	0.0043
Low literacy (STOHFLA under 23), N (%)	NA	NA
Employed full or part time, N (%)	45 (77.59)	17 (77.27)	1
***Household income ≤ 40K, N (%), (missing = 1%)	32 (61.54)	4 (18.18)	0.0008
Currently have health insurance, N (%)	49 (84.48)	20 (90.91)	0.7183
Self-rated health good-excellent, N (%)	44 (75.86)	20 (90.91)	0.2109
CVD Risk Factors
Current cigarette smoker, N (%)	6 (10.35)	2 (9.10)	1
Diabetes (self-report or HbA1c ≥ 6.5), N (%)	19 (32.76)	9 (18.18)	0.6012
Total cholesterol (mg/dL), mean (SE)	194.66 (5.54)	180.59 (7.84)	0.1724
HDL-C (mg/dL), mean (SE)	57.25 (1.76)	55.27 (3.67)	0.588
Systolic BP (mmHg), mean (SE)	125.73 (2.05)	123.47 (3.08)	0.5572
Diastolic BP (mmHg), mean (SE)	78.55 (1.18)	75.24 (2.28)	0.1676
Systolic BP ≥ 140 mmHg, N (%)	11 (18.97)	4 (18.18)	1
Physiologic Factors
Weight (kg), mean (SE)	97.89 (3.10)	92.21 (4.85)	0.335
BMI, mean (SE)	37.11 (1.11)	32.99 (1.96)	0.0617
Number of comorbidities, mean (SE)	2.43 (0.25)	2.36 (0.36)	0.8839
GFR (mg/dL), mean (SE)	90.29 (2.57)	81.45 (3.69)	0.0666
Medication and Adherence
Taking BP lowering medication, N (%)	41 (70.69)	11 (50.00)	0.1155
Number of BP medication classes, mean (SE)	1.36 (0.14)	1.00 (0.25)	0.1995

## Sheet: Supplemental Table 5
											AA Cohort										CAU Cohort
dbSNP ID	Region	Gene(s)	Chr.	Position	Ancestry	PMID	ASW Major/Minor Allele	1000G PIII ASW MAF	CEU Major/Minor Allele	1000G PIII CEU MAF	p HET	p HOM	p Age:HET	p Age:HOM	p Age	β HET	β HOM	β Age:HET	β Age:HOM	β Age	p HET2	p HOM2	p Age:HET2	p Age:HOM2	p Age2	β HET2	β HOM2	β Age:HET2	β Age:HOM2	β Age2
rs2220511	3' UTR	C21orf91-OT1, C21orf91	21	19164911	AA	21378095	C/T	0.50	C/T	0.27	0.002	0.156	0.001	0.092	0.288	56.1867	-28.3247	-1.01273	0.58047	0.686928	0.643	0.798	0.671	0.851	0.775	26.468	-14.5482	-0.3659	0.16132	0.343234
rs243607	3' UTR	C21orf91-OT1, C21orf91	21	19161515	AA	21378095	A/G	0.48	A/G	0.43	0.005	0.451	0.003	0.305	0.381	50.8297	15.2905	-0.92771	-0.35959	0.566194	0.498	0.756	0.494	0.847	0.919	-18.6366	-10.0736	0.304646	0.100898	0.090852
rs243605	intronic	C21orf91-OT1, C21orf91	21	19161120	AA	21378095	G/C	0.48	G/C	0.43	0.005	0.451	0.003	0.305	0.381	50.8297	-15.2905	-0.92771	0.35959	0.566194	0.498	0.756	0.494	0.847	0.919	-18.6366	10.0736	0.304646	-0.100898	0.090852
rs243603	intronic	C21orf91-OT1	21	19160300	AA	21378095	T/C	0.48	T/C	0.43	0.005	0.451	0.003	0.305	0.381	50.8297	15.2905	-0.92771	-0.35959	0.566194	0.498	0.756	0.494	0.847	0.919	-18.6366	-10.0736	0.304646	0.100898	0.090852
rs243601	intronic	C21orf91-OT1	21	19159766	AA	21378095	A/G	0.44	G/A	0.43	0.021	0.222	0.007	0.135	0.511	44.3054	25.487	-0.88236	-0.54192	0.425929	0.469	0.798	0.458	0.907	0.841	-20.4299	8.05387	0.33878	-0.059765	0.187862
rs592582	intronic	LOC107985955	2	157773386	AA	21378095	T/G	0.36	G/T	0.096	0.023	0.262	0.009	0.285	0.81	37.2579	27.2385	-0.73107	-0.45926	-0.14349	0.862	0.988	0.569	0.686	0.621	14.4927	-1.26269	-0.76832	0.53091	0.690613
rs2258119	intronic	C21orf91	21	19167479	AA	21378095	T/C	0.34	T/C	0.20	0.504	0.03	0.688	0.008	0.668	10.5971	-46.9627	-0.10895	1.02215	-0.24835	0.546	0.991	0.688	0.933	0.821	14.6246	-0.69319	-0.15992	-0.07686	0.175638
rs243609	3' UTR	C21orf91-OT1, C21orf91	21	19161689	AA	21378095	C/T	0.45	C/T	0.43	0.053	0.528	0.074	0.354	0.879	35.1743	12.6353	-0.56	-0.322134	0.092501	0.848	0.711	0.762	0.789	0.837	-5.44279	-12.0006	0.141482	0.14014	0.163523
rs12408339	intergenic	RHBG, C1orf61	1	156355510	AA	21378095	G/A	0.082	G/A	0.10	0.245	0.606	0.265	NA	0.558	34.3577	10.6489	-0.56235	NA	-0.33673	0.283	0.771	0.227	NA	0.758	31.7422	-6.09539	-0.52704	NA	0.2452
rs1401454	intronic	SOX6	11	16250183	AA	23972371	C/T	0.47	C/T	0.42	0.269	0.957	0.26	0.861	0.427	-18.9213	1.21818	0.327837	-0.068277	-0.47808	0.689	0.643	0.631	0.78	0.986	10.852	16.2897	-0.20882	-0.163649	0.016234
rs214070	intronic	NUCB2	11	17305317	AA	21378095	T/A	0.098	T/A	0.26	0.301	NA	0.278	NA	0.448	-27.1736	NA	0.479698	NA	-0.43026	0.099	0.49	0.074	0.556	0.748	-40.2344	40.1229	0.720287	-0.55882	-0.26311
rs12985799	intronic	SLC25A42	19	19187575	AA	21378095	T/C	0.33	T/C	0.17	0.659	0.708	0.521	0.861	0.591	-9.17925	7.67527	0.222723	-0.05974	-0.3445	0.456	0.112	0.821	NA	0.959	26.5272	32.7397	0.109982	NA	0.040184
rs17428471	intergenic	EVX1, LOC107986733	7	27337867	AA	23972371	G/T	0.074	G/T	0.061	0.67	0.724	0.595	0.803	0.34	-7.53389	-39.4086	0.161713	0.57729	-0.57112	0.199	0.854	0.241	0.853	0.744	36.2739	676.538	-0.53379	-13.716	0.270911
rs1990151	intronic	IPO13, LOC101929609	1	44414292	AA	21378095	G/A	0.057	G/A	0	0.702	0.758	0.755	0.755	0.502	9.42547	-139.739	-0.12916	2.51428	-0.39811	NA	NA	NA	NA	NA	NA	NA	NA	NA	NA
rs10417974	3' UTR	SLC25A42	19	19222070	AA	21378095	T/C	0.34	T/C	0.17	0.707	0.842	0.515	0.992	0.576	-7.6115	4.16986	0.220279	0.003442	-0.36404	0.406	0.109	0.918	NA	0.943	29.4578	32.9424	0.049951	NA	0.055721
rs2012318	intronic	SLC25A42	19	19208240	AA	21378095	T/C	0.34	T/C	0.17	0.734	0.871	0.531	0.972	0.563	-6.88746	3.41105	0.212042	0.012419	-0.37615	0.445	0.111	0.839	NA	0.955	27.1022	32.7719	0.098476	NA	0.043974
rs11666627	intronic	SLC25A42	19	19211238	AA	21378095	T/C	0.34	T/C	0.17	0.743	0.88	0.535	0.966	0.559	-6.64558	3.14944	0.209899	0.014816	-0.3804	0.445	0.111	0.839	NA	0.955	27.1022	32.7719	0.098476	NA	0.043974
rs6511018	intronic	SLC25A42	19	19186705	AA	21378095	A/G	0.34	A/G	0.17	0.75	0.446	0.723	0.553	0.477	-5.43181	-16.8853	0.104606	0.217901	-0.40799	0.846	0.111	0.839	NA	0.955	-5.6697	-32.7718	0.098476	NA	0.043974
rs13413144	intronic	FMNL2	2	153475253	AA	21378095	A/T	0.049	A/T	0.29	0.845	NA	0.925	NA	0.461	5.02802	NA	-0.0444	NA	-0.4232	0.565	0.428	0.57	0.502	0.829	-14.2829	-32.22	0.230977	0.422731	-0.1859
rs1378942	intronic	CSK	15	75077367	CAU	21909115	C/A	0.089	A/C	0.32	0.073	0.473	0.107	NA	0.288	-54.955	14.5805	0.65376	NA	-0.6085	0.031	0.538	0.036	0.694	0.639	-56.0329	-19.1531	0.888688	0.199308	-0.38476
rs17477177	intergenic	CTB-30L5.1	7	106411858	CAU	21909110	T/C	0.12	T/C	0.22	0.525	NA	0.579	NA	0.383	-12.5043	NA	0.188823	NA	-0.52652	0.164	0.017	0.255	0.012	0.316	32.1443	18.0839	-0.43157	-3.24228	0.819053
rs1799945	exonic, missense	HFE	6	26091179	CAU	21909115	C/G	0.049	C/G	0.13	0.017	NA	0.015	NA	0.575	-53.3546	NA	0.997511	NA	-0.3175	0.521	0.495	0.372	NA	0.792	16.5197	14.0109	-0.36744	NA	0.204079
rs2521501	intronic	FES	15	91437388	CAU	21909115	A/T	0.23	A/T	0.34	0.038	0.965	0.026	0.924	0.16	-30.6154	2.3536	0.563247	0.086007	-0.83142	0.91	0.631	0.972	0.743	0.859	2.86923	17.1289	0.014501	-0.19098	0.144732
rs381815	intronic	PLEKHA7	11	16902268	CAU	21909115	C/T	0.18	C/T	0.32	0.047	0.015	0.042	0.015	0.014	-14.295	17.3471	2.69518	-3.19394	-3.46533	0.38	0.479	0.349	0.462	0.36	78.8149	-63.1151	-1.39608	1.08403	1.59299
rs12940887	intronic	ZNF652	17	47402807	CAU	21909115	C/T	0.049	C/T	0.41	0.092	0.345	0.06	NA	0.667	37.7818	-19.3849	-0.72441	NA	-0.24631	0.622	0.675	0.732	0.857	0.909	-13.6634	15.0655	0.154572	-0.106524	-0.10262
rs1173771	intergenic	NPR3	5	32815028	CAU	21909115	G/A	0.21	G/A	0.050	0.145	0.067	0.098	0.054	0.374	52.267	-66.6692	-1.10124	1.29771	0.744576	0.228	0.692	0.23	0.728	0.666	-43.5699	14.3387	0.734731	-0.209444	-0.44779
rs319690	intronic	MAP4	3	47927484	CAU	21909110	C/T	0.45	T/C	0.34	0.18	0.339	0.241	0.389	0.959	29.1138	-20.9387	-0.42845	0.31545	0.034978	0.514	0.884	0.465	0.822	0.821	-16.9004	7.10419	0.3087	-0.18623	0.176737
rs7129220	intronic	CAND1.11	11	10350538	CAU	21909115	G/A	0.041	G/A	0.10	0.182	0.446	0.149	NA	0.462	-24.2827	-15.7505	0.450226	NA	-0.42178	0.251	0.231	0.198	NA	0.501	31.5706	-24.8982	-0.59108	NA	0.539653
rs1446468	intronic	FIGN, GRB14	2	164963486	CAU	21909110	T/C	0.090	C/T	0.47	0.199	0.656	0.225	0.629	0.608	22.6127	-22.5885	-0.37398	0.43415	-0.30903	0.387	0.485	0.411	0.469	0.704	28.1855	-24.5916	-0.44483	0.41326	0.311297
rs17367504	intronic	MTHFR	1	11862778	CAU	21909115	A/G	0.16	A/G	0.16	0.222	0.129	0.284	0.16	0.315	-23.8603	-87.9571	0.370575	1.28559	-0.5982	0.772	0.996	0.689	0.999	0.926	-8.05	-0.451	0.183	-0.000769	-0.0816
rs10850411	intergenic	LOC107984437, LOC102723639	12	115387796	CAU	21909115	T/C	0.29	T/C	0.31	0.238	0.881	0.255	0.909	0.312	-18.3144	3.58254	0.303734	-0.04712	-0.58829	0.865	0.575	0.998	0.334	0.669	-4.11073	20.7874	-0.00117	-0.5474	0.346194
rs1813353	intronic	CACNB2	10	18707448	CAU	21909115	T/C	0.17	T/C	0.36	0.349	0.945	0.422	0.965	0.528	16.69	-23.1903	-0.24546	0.260856	-0.36563	0.376	0.264	0.583	0.281	0.878	-20.1288	71.2234	0.203868	-1.11979	0.118804
rs17608766	3' UTR	GOSR2	17	45013271	CAU	21909115	T/C	0.049	T/C	0.13	0.459	NA	0.238	NA	0.5	-22.7206	NA	0.632826	NA	-0.38504	0.351	0.433	0.401	0.424	0.906	-24.7957	-46.3892	0.373313	0.78367	0.093591
rs932764	intronic	PLCE1	10	95895940	CAU	21909115	A/G	0.27	A/G	0.39	0.467	0.814	0.668	0.84	0.399	12.0678	11.3825	-0.1243	-0.15082	-0.48281	0.57	0.41	0.395	0.354	0.958	-14.6841	-31.4226	0.359536	0.58823	-0.04136
rs11953630	intergenic	LOC101927697, EBF1	5	157845402	CAU	21909115	C/T	NA	C/T	NA	0.534	0.441	0.449	0.467	0.556	11.2224	31.9275	-0.24276	-0.519922	-0.33731	0.964	0.64	0.884	0.637	0.91	1.18405	20.9758	0.062318	-0.344657	-0.11083
rs2932538	intronic	MOV10	1	113216543	CAU	21909115	G/A	0.19	G/A	0.26	0.534	0.337	0.495	0.223	0.887	18.1741	-26.9416	-0.35626	0.61544	0.107653	0.065	0.074	0.072	0.065	0.23	108.563	-106.536	-1.68575	1.75913	1.40676
rs633185	intronic	ARHGAP42	11	100593538	CAU	21909115	G/C	0.21	C/G	0.30	0.542	0.37	0.568	0.381	0.926	29.1167	-42.3778	-0.4776	0.72617	0.090905	0.585	0.834	0.672	0.898	0.952	-32.3654	12.3642	0.422075	-0.127064	0.06247
rs419076	intronic	MECOM	3	169100886	CAU	21909115	T/C	0.48	C/T	0.45	0.548	0.145	0.423	0.135	0.635	11.3706	33.1207	-0.25506	-0.5757	-0.29142	0.626	0.44	0.898	0.266	0.774	14.1067	26.7379	-0.05992	-0.625382	-0.26879
rs4373814	intergenic	SLC39A12, CACNB2	10	18419972	CAU	21909115	C/G	0.46	G/C	0.36	0.563	0.526	0.666	0.51	0.646	13.3779	-15.1137	-0.17189	0.27126	-0.30042	0.947	0.986	0.739	0.885	0.743	1.65544	0.59037	-0.13552	-0.080552	0.265487
rs6015450	intronic	ZNF831	20	57751117	CAU	21909115	A/G	0.17	A/G	0.061	0.571	0.197	0.494	0.233	0.646	9.07945	-51.7221	-0.19094	0.773134	-0.28078	0.968	0.9	0.877	0.988	0.939	-1.00894	24.5717	-0.06288	-0.0565	0.058805
rs13082711	intergenic	SLC4A7, LOC105377005	3	27537909	CAU	21909115	T/C	0.049	T/C	0.22	0.676	0.898	0.752	NA	0.441	-12.0474	-2.63474	0.157905	NA	-0.44053	0.295	0.983	0.409	0.839	0.835	27.3776	0.822791	-0.34863	0.125725	-0.16267
rs805303	intronic	BAG6	6	31616366	CAU	21909115	A/G	0.39	G/A	0.31	0.826	0.091	0.928	0.152	0.526	-3.90241	-36.8686	0.027912	0.554679	-0.36366	0.576	0.492	0.458	0.392	0.739	17.6488	-24.2655	-0.38026	0.49068	0.283361
rs1327235	intronic	C20orf187	20	10969030	CAU	21909115	G/A	0.44	G/A	0.48	0.895	0.71	0.681	0.462	0.693	2.45085	-7.84535	-0.13263	0.26876	-0.25669	0.155	0.596	0.157	0.618	0.617	38.5421	-17.226	-0.61823	0.26148	0.415368
rs13139571	intronic	GUCY1A3, LOC105377506	4	156645513	CAU	21909115	C/A	0.12	C/A	0.24	0.913	0.257	0.992	0.17	0.624	2.00041	-69.5226	-0.00304	1.65123	-0.28943	0.244	0.246	0.296	0.331	0.967	33.636	-51.0985	-0.48175	0.72843	-0.03237
rs4590817	intronic	C10orf107	10	63467553	CAU	21909115	G/C	0.16	G/C	0.17	0.951	0.415	0.872	0.413	0.514	0.981986	48.958	0.044295	-0.86345	-0.38668	0.602	0.534	0.593	0.423	0.89	-16.9836	54.6134	0.284743	-1.04753	0.107306
rs17249754	intronic	ATP2B1	12	90060586	CAU	21909115	G/A	0.12	G/A	0.12	0.966	0.922	0.946	0.89	0.942	13.54	-30.9253	-0.40472	0.8281	0.437119	0.988	0.506	0.605	NA	0.746	-0.51013	13.7002	-0.22258	NA	0.274758
rs1458038	intronic	LOC105377304	4	81164723	CAU	21909115	C/T	0.074	C/T	0.24	0.974	0.607	0.868	0.674	0.819	-2.01027	-31.8265	0.175148	0.43683	-0.25844	0.53	0.791	0.601	0.833	0.633	34.5168	-14.5786	-0.48144	0.19383	0.556697
rs3184504	exonic, missense	SH2B3	12	111884608	CAU	21909115	C/T	0.11	C/T	0.45	NA	0.01	NA	0.011	0.019	NA	91.0303	NA	-1.57172	-1.85828	0.079	0.135	0.091	0.137	0.348	63.4247	-55.5895	-1.03012	0.93559	0.842808

## Sheet: Supplemental Table 6
		AA Cohort										CAU Cohort
dbSNP ID	Ancestry	p HET	p HOM	p Age:HET	p Age:HOM	p Age	β HET	β HOM	β Age:HET	β Age:HOM	β Age	p HET2	p HOM2	p Age:HET2	p Age:HOM2	p Age2	β HET2	β HOM2	β Age:HET2	β Age:HOM2	β Age2
rs592582	AA	0.025	0.122	0.02	0.118	0.581	-43.1017	-43.9895	0.753518	0.786111	-0.38517	0.685	0.678	0.758	0.714	0.545	34.4858	-34.3672	-0.42399	0.4916	0.863291
rs2220511	AA	0.73	0.577	0.594	0.442	0.702	-7.43883	13.1981	0.19663	-0.313409	-0.2935	0.495	0.751	0.48	0.856	0.832	-38.4509	17.7771	0.600462	-0.153331	0.252062
rs2258119	AA	0.848	0.851	0.714	0.664	0.97	3.62897	4.79879	-0.11814	-0.19586	0.026322	0.308	0.962	0.22	0.784	0.539	-24.5844	-2.87773	0.486347	0.249532	0.473837
rs243607	AA	0.822	0.826	0.645	0.624	0.731	-4.7151	-5.26278	0.166221	0.203465	-0.26331	0.498	0.554	0.641	0.668	0.506	18.649	19.1711	-0.20739	-0.22423	0.596723
rs243609	AA	0.961	0.719	0.947	0.513	0.866	-1.04646	-8.48143	0.024391	0.26764	-0.12023	0.701	0.421	0.612	0.483	0.648	-10.8306	25.957	0.235775	-0.365227	0.360987
rs6511018	AA	0.884	0.671	0.82	0.584	0.897	2.88539	10.8963	-0.07776	-0.23288	0.085763	0.618	0.35	0.552	NA	0.59	-14.6963	19.2847	0.29089	NA	0.422316
rs214070	AA	0.106	NA	0.081	NA	0.975	48.9383	NA	-0.89104	NA	0.020304	0.19	0.63	0.241	0.665	0.289	32.2605	-28.2656	-0.47659	0.415228	0.879797
rs12408339	AA	0.825	0.411	0.972	NA	0.921	7.52285	-19.6203	-0.02058	NA	-0.06572	0.191	0.325	0.12	NA	0.652	-38.3731	20.5053	0.674403	NA	0.356086
rs243603	AA	0.822	0.826	0.645	0.624	0.731	-4.7151	-5.26278	0.166221	0.203465	-0.26331	0.498	0.554	0.641	0.668	0.506	18.649	19.1711	-0.20739	-0.22423	0.596723
rs1990151	AA	0.995	0.652	0.996	0.889	NA	NA	NA	NA	NA	-3.46011	NA	NA	NA	NA	0.657	7.53431	-15.6232	-0.17614	0.25625	NA
rs10417974	AA	0.977	0.898	0.985	0.8	0.962	0.670348	-3.11664	-0.00732	0.103076	-0.03593	0.316	0.346	0.501	NA	0.593	-35.7728	-19.4272	0.327745	NA	0.417436
rs243601	AA	0.839	0.712	0.964	0.933	0.962	4.55123	9.07726	-0.01742	-0.03604	-0.03609	0.527	0.519	0.669	0.634	0.51	17.9011	-20.3841	-0.19536	0.24356	0.62004
rs12985799	AA	0.776	0.604	0.788	0.606	0.847	6.86979	-12.2895	-0.10795	0.203871	-0.14354	0.41	0.358	0.679	NA	0.575	-29.6259	-19.0151	0.203719	NA	0.440873
rs1401454	AA	0.318	0.656	0.438	0.585	0.918	19.6924	-11.5611	-0.25956	0.24531	0.071098	0.337	0.092	0.308	0.074	0.838	-26.0781	59.6713	0.443562	-1.05006	-0.19057
rs13413144	AA	0.127	NA	0.153	NA	0.863	-45.2124	NA	0.775061	NA	-0.11354	0.808	0.128	0.778	0.124	0.259	-6.00616	61.8547	0.113981	-0.96862	0.969272
rs17428471	AA	0.457	0.307	0.395	0.331	0.733	15.1955	131.668	-0.29839	-2.60457	0.235088	0.684	0.414	0.606	0.415	0.849	-11.5175	3020.83	0.235312	-60.7699	0.158095
rs243605	AA	0.822	0.826	0.645	0.624	0.731	-4.7151	5.26278	0.166221	-0.203465	-0.26331	0.498	0.554	0.641	0.668	0.506	18.649	-19.1711	-0.20739	0.22423	0.596723
rs2012318	AA	0.978	0.893	0.987	0.798	0.956	0.636388	-3.2772	-0.00633	0.104266	-0.0412	0.342	0.35	0.552	NA	0.59	-33.981	-19.2847	0.29089	NA	0.422316
rs11666627	AA	0.993	0.909	0.995	0.806	0.965	0.218742	-2.79139	-0.00265	0.099758	-0.03309	0.342	0.35	0.552	NA	0.59	-33.981	-19.2847	0.29089	NA	0.422316
rs13082711	CAU	0.781	0.915	0.721	NA	0.99	-9.28182	2.52991	0.205787	NA	-0.00811	0.047	0.781	0.054	0.919	0.354	-52.297	-10.5174	0.820259	0.062493	0.72403
rs10850411	CAU	0.639	0.946	0.81	0.998	0.907	8.41627	1.86694	-0.07431	-0.00136	0.079017	0.147	0.655	0.1	0.554	0.46	34.9007	-16.472	-0.65354	0.333518	0.596111
rs1378942	CAU	0.675	0.811	0.872	NA	0.921	14.9096	-5.67114	-0.07584	NA	0.066476	0.25	0.093	0.258	0.085	0.25	30.0895	53.2029	-0.48282	-0.89236	0.96166
rs1458038	CAU	0.843	0.897	0.906	0.883	0.986	14.4233	9.31448	-0.14421	-0.177214	-0.02245	0.781	0.585	0.843	0.634	0.949	-15.3808	30.1701	0.183486	-0.439368	0.074373
rs17249754	CAU	0.928	0.873	0.937	0.885	0.892	-33.195	58.7215	0.548687	-1.00985	-0.95599	0.815	0.743	0.629	NA	0.654	-7.77661	-6.76992	0.208414	NA	0.38192
rs17367504	CAU	0.371	0.183	0.367	0.176	0.832	20.287	89.3946	-0.36214	-1.43781	0.146239	0.65	0.924	0.747	0.85	0.561	12.6208	7.7764	-0.1475	-0.22325	0.511242
rs17477177	CAU	0.545	NA	0.383	NA	0.72	13.6979	NA	-0.34219	NA	0.249016	0.311	0.216	0.442	0.216	0.997	-24.0031	-95.2527	0.299371	1.634	0.003236
rs17608766	CAU	0.961	NA	0.882	NA	0.914	1.72663	NA	0.092846	NA	0.071533	0.672	0.276	0.756	0.274	0.45	11.233	-64.6921	-0.13821	1.07566	0.599085
rs2932538	CAU	0.477	0.771	0.342	0.49	0.601	-24.1285	9.44466	0.576791	-0.404602	-0.45879	0.933	0.682	0.805	0.683	0.279	4.89147	-24.2354	-0.22978	0.38727	1.26774
rs381815	CAU	0.887	0.839	0.803	0.782	0.794	12.047	-16.9786	-0.3892	0.42722	0.431987	0.204	0.197	0.198	0.188	0.383	-114.743	115.577	1.92607	-1.95171	-1.52107
rs805303	CAU	0.568	0.492	0.545	0.449	0.893	-11.8319	17.3989	0.217806	-0.34085	-0.09004	0.922	0.38	0.977	0.355	0.776	-3.09356	30.9846	-0.01493	-0.530089	0.241887
rs1799945	CAU	0.773	NA	0.729	NA	0.984	-7.52958	NA	0.165634	NA	0.013178	0.967	0.464	0.789	NA	0.578	-1.07226	-15.1579	0.110818	NA	0.433806
rs3184504	CAU	NA	0.637	NA	0.611	0.713	NA	-19.5068	NA	0.36542	0.339801	0.614	0.731	0.611	0.792	0.807	-18.3754	12.9117	0.312595	-0.167835	0.221714
rs2521501	CAU	0.41	0.357	0.314	0.404	0.709	14.0853	-58.2838	-0.29556	0.881879	0.256343	0.554	0.706	0.473	0.86	0.508	15.0352	-13.4516	-0.29729	0.102889	0.53713
rs11953630	CAU	0.394	0.362	0.309	0.278	0.895	-17.6959	-43.4796	0.374977	0.89188	-0.08682	0.384	0.818	0.332	0.887	0.329	23.0719	-10.337	-0.41762	0.10404	0.956882
rs1446468	CAU	0.822	0.732	0.743	0.682	0.824	4.59404	20.1462	-0.11715	-0.42781	0.15545	0.537	0.451	0.5	0.505	0.607	-20.0684	26.5649	0.363926	-0.380209	0.420718
rs12940887	CAU	0.866	0.557	0.797	NA	0.997	-4.40341	14.0971	0.115219	NA	-0.00227	0.083	0.929	0.101	0.969	0.154	48.1308	-3.18097	-0.74088	-0.022585	1.28032
rs6015450	CAU	0.784	0.436	0.615	0.324	0.748	-5.03962	35.8475	0.161529	-0.73363	-0.22566	0.067	0.578	0.104	0.492	0.397	44.9017	106.911	-0.64854	-2.44874	0.642299
rs1173771	CAU	0.774	0.615	0.818	0.727	0.859	-11.982	21.2531	0.177611	-0.272651	-0.17336	0.621	0.704	0.644	0.675	0.443	18.0827	-13.9588	-0.28608	0.25517	0.805823
rs7129220	CAU	0.377	0.275	0.313	NA	0.999	18.6	26.1	-0.363	NA	-0.00079	0.773	0.607	0.725	NA	0.709	-8.05707	10.8364	0.163382	NA	0.303582
rs319690	CAU	0.687	0.305	0.629	0.352	0.835	-10.0707	25.923	0.203614	-0.394316	-0.1639	0.756	0.663	0.728	0.755	0.56	8.07435	-21.4052	-0.14717	0.259766	0.458233
rs4590817	CAU	0.722	0.667	0.611	0.697	0.996	6.6113	29.9235	-0.16156	-0.475829	-0.00382	0.276	0.464	0.235	0.361	0.586	35.455	-64.1433	-0.63329	1.19047	0.422617
rs4373814	CAU	0.924	0.717	0.808	0.797	0.957	2.54182	10.0132	-0.112	-0.122691	0.041307	0.283	0.587	0.206	0.559	0.889	-27.2604	18.7489	0.523883	-0.331702	0.114764
rs932764	CAU	0.322	0.802	0.512	0.921	0.885	-18.9422	-13.9257	0.218479	0.085014	0.095127	0.709	0.846	0.685	0.998	0.603	-9.80632	7.51946	0.173981	0.001289	0.417148
rs419076	CAU	0.128	0.461	0.079	0.385	0.676	-33.3508	-19.2951	0.646568	0.386239	-0.29584	0.632	0.735	0.793	0.526	0.563	-14.0847	-11.9166	0.124427	0.36151	0.550856
rs1813353	CAU	0.603	0.273	0.839	0.279	0.924	-10.6249	426.63	0.071414	-7.3799	0.06379	0.254	0.833	0.221	0.745	0.399	26.3507	13.5543	-0.46169	-0.34082	0.662625
rs13139571	CAU	0.489	0.945	0.508	0.881	0.883	-14.7522	-4.89773	0.236582	-0.209439	0.100779	0.256	0.578	0.238	0.356	0.639	32.3507	-24.1546	-0.53662	0.68133	0.358673
rs1327235	CAU	0.178	0.307	0.281	0.576	0.61	28.6734	-24.7564	-0.3991	0.23403	0.380148	0.329	0.922	0.316	0.674	0.821	-26.0955	3.13544	0.432087	-0.21785	0.185745
rs633185	CAU	0.707	0.728	0.777	0.778	0.853	20.7628	-19.0521	-0.27398	0.27052	0.20963	0.839	0.861	0.894	0.902	0.696	11.9473	10.2238	-0.13265	-0.120774	0.405824

## Sheet: Supplemental Table 7
dbSNP ID	Region	Gene(s)	Chr.	GRCh37	ASW Major/Minor Allele	1000G PIII ASW MAF	HHL AA MAF	p HET	p HOM	p Age: HET	p Age: HOM	β HET	β HOM	β Age: HET	β Age: HOM
rs10187234	intergenic	DDX18, DPP10	2	118364722	C/A	0.25	0.275591	0.000144395	4.91874e-06	0.000113561	5.45118e-06	-179.618	215.354	3.10596	-3.65242
rs1868394	intergenic	HS6ST1, UGGT1	2	129015968	G/A	0.16	0.0905512	9.06217e-05	7.02625e-05	8.82196e-05	7.0774e-05	-865.918	877.356	13.5966	-13.734		1.16282e-06		8.82196e-05
rs6833993	intronic	BST1	4	15741293	A/G	0.17	0.120079	0.132369	1.16282e-06	0.174808	1.48454e-06	-26.6088	559.384	0.404333	-9.23627		1.35642e-06
rs7786926	intergenic	AUTS2	7	68814378	C/T	0.27	0.216535	4.13421e-05	7.56012e-05	3.67405e-05	6.59861e-05	-412.896	397.524	7.11063	-6.8583		1.48454e-06		3.67405e-05
rs6977381	intronic	AOC1, LOC105375567	7	150542646	A/G	0.2	0.145669	0.0523914	3.74059e-05	0.061637	6.60173e-05	31.7824	305.712	-0.536426	-4.9672		2.91528e-06
rs75253845	missense transcript variant	MTUS1	8	17612064	A/C	0.016	0.108268	0.231768	8.18645e-05	0.316787	0.000127473	NA	NA	NA	NA		2.97891e-06
rs10955078	intergenic	CPQ, SDC2	8	97629906	A/G	0.18	0.204724	0.729492	1.18682e-05	0.808226	0.000129	-5.23097	220.094	0.0651187	-2.99698		3.01861e-06
rs716580	intergenic	DMRTA1, CDKN2B-AS1	9	22336434	A/G	0.15	0.102362	0.392855	9.40644e-05	0.359214	9.98956e-05	20.6224	-1640.5	-0.384915	29.3413		3.01861e-06
rs7906433	intergenic	KLF6	10	3888845	C/T	0.19	0.222441	4.3605e-05	4.83111e-05	6.5856e-05	7.08503e-05	-332.687	329.641	5.50921	-5.47143		3.12291e-06		6.5856e-05
rs12255472	intergenic	KLF6	10	4466023	T/C	0.082	0.0984252	0.150527	4.59835e-05	0.341548	3.61877e-05	24.4786	749.77	-0.277124	-11.9369		3.12291e-06
rs11597228	intergenic	CELF2	10	10660838	A/G	0.41	0.464567	0.00884024	2.97891e-06	0.00848977	2.91528e-06	-44.1828	-98.5432	0.767722	1.69196		3.42605e-06
rs4747873	intergenic	CELF2	10	10686085	C/T	0.37	0.427165	0.00482693	2.81117e-05	0.00699502	3.03762e-05	55.5973	-89.0546	-0.93565	1.53691		3.60145e-06
rs1571942	intronic	PLXDC2	10	20542634	A/G	0.16	0.143701	0.00856947	9.42364e-05	0.0189716	0.000118732	NA	NA	NA	NA		3.60145e-06
rs1379801	intergenic	FAT3	11	91949035	G/T	0.23	0.200787	1.6647e-05	1.05718e-05	2.3615e-05	1.54296e-05	-521.022	532.824	8.6483	-8.83686		3.60145e-06		2.3615e-05
rs10506768	intronic	NAV3	12	78446183	G/A	0.11	0.0984252	3.09555e-05	3.42605e-06	1.84778e-05	1.35642e-06	-358.506	389.097	6.06094	-6.622		4.7905e-06		1.84778e-05
rs744664	intronic	NOS1	12	117732101	G/A	0.1	0.0866142	4.7905e-06	1.01963e-05	5.16877e-06	1.13782e-05	-1550.17	1491.38	27.7495	-26.6431		4.91874e-06		5.16877e-06
rs8001907	intronic	PCDH17	13	58248789	C/T	0.12	0.141732	1.82871e-05	2.15779e-05	2.70531e-05	2.75137e-05	-415.1	407.798	7.04994	-6.97756		5.16877e-06		2.70531e-05
rs16953364	intergenic	IRX3, FTO	16	54357604	T/C	0.049	0.0964567	0.567068	5.84374e-05	0.457712	6.37403e-05	11.0576	-897.311	-0.247391	15.4271		5.45118e-06
rs232358	intronic, 3' UTR	AQP4-AS1, CHST9	18	24492099	C/T	0.074	0.151575	3.60145e-06	0.000525662	0.0027188	NA	-126.631	78.0563	0.830785	NA		1.01963e-05
rs1181704	intronic, 3' UTR	AQP4-AS1, CHST9	18	24492641	G/T	0.074	0.151575	3.60145e-06	0.000525662	0.0027188	NA	-126.631	78.0563	0.830785	NA		1.05718e-05
rs380625	intronic, 3' UTR	AQP4-AS1, CHST9	18	24493117	C/T	0.074	0.151575	3.60145e-06	0.000525662	0.0027188	NA	-126.631	78.0563	0.830785	NA		1.13782e-05
rs16942954	intronic	AQP4-AS1, CHST9	18	24501350	A/G	0.14	0.129921	0.394507	3.12291e-06	0.381296	3.01861e-06	13.444	946.009	-0.242511	-14.3473		1.18682e-05
rs16942955	intronic	AQP4-AS1, CHST9	18	24502493	A/G	0.14	0.129921	0.394507	3.12291e-06	0.381296	3.01861e-06	13.444	946.009	-0.242511	-14.3473		1.54296e-05
rs1435268	intergenic	DSC3	18	28439211	G/A	0.13	0.11811	9.02838e-05	8.36185e-05	8.52514e-05	8.10045e-05	1581.56	-1587.1	-28.3337	28.3908		1.6647e-05		8.52514e-05
rs3830420 (indel)	frameshift transcript variant	DHDH	19	49442849	-/G	0.074	0.13	0.675404	3.51829e-05	0.544803	3.34534e-05	NA	NA	NA	NA		1.82871e-05
rs7285884	intergenic	SEPT4, CLDN5	22	19677354	G/A	0.09	0.125984	2.4783e-05	2.29604e-05	3.33129e-05	2.82657e-05	-558.532	558.102	9.11471	-9.15163		1.84778e-05		3.33129e-05
																	2.15779e-05
																	2.29604e-05
																	2.3615e-05
																	2.4783e-05
																	2.70531e-05
																	2.75137e-05
																	2.81117e-05
																	2.82657e-05
																	3.03762e-05
																	3.09555e-05
																	3.33129e-05
																	3.34534e-05
																	3.51829e-05
																	3.61877e-05
																	3.67405e-05
																	3.74059e-05
																	4.13421e-05
																	4.3605e-05
																	4.59835e-05
																	4.83111e-05
																	5.84374e-05
																	6.37403e-05
																	6.5856e-05
																	6.59861e-05
																	6.60173e-05
																	7.02625e-05
																	7.0774e-05
																	7.08503e-05
																	7.56012e-05
																	8.10045e-05
																	8.18645e-05
																	8.36185e-05
																	8.52514e-05
																	8.82196e-05
																	9.02838e-05
																	9.06217e-05
																	9.40644e-05
																	9.42364e-05
																	9.98956e-05

## Sheet: Supplemental Table 8
dbSNP ID	Region	Gene(s)	Chr.	GRCh37	CEU Major/Minor Allele	1000G PIII CEU MAF	HHL CAU MAF	p HET	p HOM	p Age: HET	p Age: HOM	β HET	β HOM	β Age: HET	β Age: HOM
rs2014725	intronic	PADI2	1	17417253	C/T	0.33	0.356164	0.000644637	7.31793e-05	0.000536146	5.49774e-05	-4.79727	-27.6898	0.027988	0.420947			0.000644637	7.31793e-05	0.000536146	5.49774e-05
rs2235910	intronic	PADI2	1	17425829	T/G	0.33	0.363014	0.125175	5.54857e-05	0.121054	4.12614e-05	-24.7835	-25.8919	0.28495	0.369094			0.125175	5.54857e-05	0.121054	4.12614e-05
rs737428	intronic	PADI2	1	17429185	G/A	0.34	0.359589	0.000648285	5.45577e-05	0.000541063	4.04493e-05	22.0151	-11.1746	-0.419215	0.239924			0.000648285	5.45577e-05	0.000541063	4.04493e-05
rs4949959	intergenic	RWDD3	1	95766707	G/A	0.18	0.133562	5.71084e-05	5.39492e-05	3.44543e-05	2.95155e-05	-29.2064	1.02714	0.428893	0.164859			5.71084e-05	5.39492e-05	3.44543e-05	2.95155e-05
rs4950044	intergenic	RWDD3	1	95766797	G/T	0.16	0.123288	7.55773e-05	5.58378e-05	4.4455e-05	3.07922e-05	-46.5344	18.8767	0.670972	-0.14326			7.55773e-05	5.58378e-05	4.4455e-05	3.07922e-05
rs6683355	intergenic	RWDD3	1	95773106	C/T	0.18	0.14726	5.04491e-05	5.3867e-05	3.06205e-05	2.92891e-05	-8.76914	31.5576	0.0867855	-0.38785			5.04491e-05	5.3867e-05	3.06205e-05	2.92891e-05
rs7519220	intergenic	SRP9, ENAH	1	225863345	A/G	0.28	0.226027	0.318996	3.5295e-05	0.253857	5.41495e-06	-12.0482	-15.9426	0.175721	0.305742			0.318996	3.5295e-05	0.253857	5.41495e-06
rs7365361	intergenic	SRP9, ENAH	1	225864622	A/G	0.28	0.226027	0.318996	3.5295e-05	0.253857	5.41495e-06	-12.3529	-14.5243	0.183561	0.272869			0.318996	3.5295e-05	0.253857	5.41495e-06
rs943759	intergenic	LOC102723834	1	225886318	T/C	0.21	0.178082	0.619992	9.51628e-06	0.743271	2.06449e-06	-9.26779	-7.41504	0.164993	0.00838625			0.619992	9.51628e-06	0.743271	2.06449e-06
rs11588657	intergenic	STUM, PARP1	1	226676299	T/C	0.13	0.109589	0.632172	5.11973e-05	0.953163	9.08422e-05	-20.9622	-7.91239	0.527987	NA			0.632172	5.11973e-05	0.953163	9.08422e-05
rs6576973	3' UTR	ARID5A	2	97218367	A/G	0.025	0.0582192	2.09807e-05	0.914412	1.71564e-05	NA	-21.9388	-21.1839	0.348099	0.346623			2.09807e-05	0.914412	1.71564e-05	NA
rs7608325	intergenic	KANSL3	2	97305080	C/T	0.025	0.0547945	0.000118877	0.92049	8.5154e-06	NA	-12.3032	-6.98323	0.269263	0.110705			0.000118877	0.92049	8.5154e-06	NA
rs2292939	intronic	FER1L5	2	97365213	C/T	0.03	0.0479452	6.51278e-05	0.948737	1.43797e-06	NA	12.2541	-3.88979	-0.133599	NA			6.51278e-05	0.948737	1.43797e-06	NA
rs17200300	intronic	NOSTRIN	2	169669961	T/C	0.26	0.263699	0.434678	3.16746e-05	0.546165	0.000177575	-15.9012	-20.6774	0.348901	NA			0.434678	3.16746e-05	0.546165	0.000177575
rs7643438	intergenic	TTC14, PEX5L	3	179983857	G/A	0.3	0.273973	0.00173924	5.08593e-05	0.00340886	4.23561e-05	-49.068	31.3616	0.812492	-0.587945			0.00173924	5.08593e-05	0.00340886	4.23561e-05
rs9818172	intergenic	LOC131054	3	180022614	A/G	0.31	0.294521	0.0425952	7.53416e-06	0.0193954	9.63276e-06	NA	NA	NA	NA			0.0425952	7.53416e-06	0.0193954	9.63276e-06
rs2890726	intronic	RHOH	4	40199551	A/C	0.21	0.226027	0.45213	1.01895e-05	0.40602	7.92223e-06	0.371482	-4.74735	-0.0361232	0.055396			0.45213	1.01895e-05	0.40602	7.92223e-06
rs4956305	intergenic	INPP4B, IL15	4	142733937	G/A	0.19	0.202055	4.51318e-05	0.00010579	4.21965e-05	7.54853e-05	80.3858	-65.511	-1.41052	1.14417			4.51318e-05	0.00010579	4.21965e-05	7.54853e-05
rs7690085	intronic	FSTL5	4	162709000	C/T	0.21	0.239726	1.20623e-05	5.35938e-05	2.96435e-05	0.000131277	25.6258	-35.8727	-0.435572	0.627458			1.20623e-05	5.35938e-05	2.96435e-05	0.000131277
rs13130537	intronic	FSTL5	4	162718372	C/T	0.19	0.215753	1.45138e-05	3.89673e-05	3.40637e-05	9.637e-05	-29.4675	-17.0418	0.43278	0.407658			1.45138e-05	3.89673e-05	3.40637e-05	9.637e-05
rs10009186	intergenic	SPOCK3, TLL1	4	167644949	C/T	0.045	0.0513699	3.38323e-05	0.00909282	0.00136415	NA	-176.604	156.095	2.8128	-2.40998			3.38323e-05	0.00909282	0.00136415	NA
rs755535	intergenic	ACSL1, CENPU	4	185668375	G/A	0.41	0.428082	8.57218e-05	0.0365806	9.21276e-05	0.058742	25.0665	-14.4764	-0.425019	0.27024			8.57218e-05	0.0365806	9.21276e-05	0.058742
rs10026821	intronic	SORBS2	4	186540503	C/T	0.27	0.219178	8.42547e-05	0.000318049	6.77771e-05	0.000266542	21.7019	-42.8133	-0.417778	0.762872			8.42547e-05	0.000318049	6.77771e-05	0.000266542
rs10030246	intronic	SORBS2	4	186541887	C/T	0.27	0.219178	8.42547e-05	0.000318049	6.77771e-05	0.000266542	22.3578	-39.8787	-0.430677	0.706103			8.42547e-05	0.000318049	6.77771e-05	0.000266542
rs11739888	intronic	GALNT10	5	153616916	G/T	0.1	0.160959	0.000101887	0.00185965	5.55057e-05	0.00102251	NA	-55.9177	NA	0.974572			0.000101887	0.00185965	5.55057e-05	0.00102251
rs9454382	transcript variant	LOC105377845	6	68631478	A/G	0.32	0.332192	0.508527	0.000151288	0.483174	9.57369e-05	3.94485	47.3813	0.015887	-0.875156			0.508527	0.000151288	0.483174	9.57369e-05
rs9403788	intergenic	RAB32, GRM1	6	146785984	A/G	0.29	0.239726	2.74163e-05	0.201631	9.15312e-05	0.210101	-55.1722	-16.6006	0.978766	NA			2.74163e-05	0.201631	9.15312e-05	0.210101
rs7740742	intergenic	PSMB1, FAM120B	6	170760613	C/T	0.31	0.342466	1.31044e-05	0.000548871	1.19742e-05	0.000323675	-37.0351	6.5229	0.578629	NA			1.31044e-05	0.000548871	1.19742e-05	0.000323675
rs37957	intronic	LOC100505921, LOC105375139	7	8000971	G/A	0.32	0.304795	0.000372252	7.76063e-05	0.00033242	5.37049e-05	18.0876	-0.0427917	-0.298039	NA			0.000372252	7.76063e-05	0.00033242	5.37049e-05
rs37968	intronic	LOC100505921, LOC105375139	7	8005973	T/C	0.34	0.297945	0.666968	0.000125124	0.581401	7.8177e-05	-5.98987	249.339	0.261154	-4.60077			0.666968	0.000125124	0.581401	7.8177e-05
rs1468594	intronic	GLCCI1	7	8122313	C/A	0.22	0.191781	1.18e-05	7.60431e-06	1.87573e-05	1.33497e-05	-39.3818	40.6824	0.679578	-0.657173			1.18e-05	7.60431e-06	1.87573e-05	1.33497e-05
rs2329939	intronic	LOC105375279	7	52094719	C/T	0.26	0.25	0.00239062	9.19377e-05	0.0084508	0.000157428	-362.657	317.243	6.78268	-6.05151			0.00239062	9.19377e-05	0.0084508	0.000157428
rs17292859	intronic	TOX	8	59736227	T/G	0.2	0.25	0.0797995	6.13677e-05	0.0694139	0.000222708	-6.61736	NA	0.0957432	NA			0.0797995	6.13677e-05	0.0694139	0.000222708
rs7842871	intronic	LOC105375864	8	61209459	T/C	0.15	0.160959	0.636862	7.10119e-06	0.469703	6.16358e-06	-1.72892	3.85013	-0.0691982	-0.15246			0.636862	7.10119e-06	0.469703	6.16358e-06
rs13275450	intergenic	SULF1, PREX2	8	70143771	G/A	0.18	0.191781	0.000199525	0.000749118	5.651e-05	0.000169798	101.962	-124.787	-2.12667	2.46023			0.000199525	0.000749118	5.651e-05	0.000169798
rs7463966	intergenic	ZFAT, ST3GAL1	8	135348578	G/A	0.2	0.143836	0.000213995	6.09914e-05	0.000177525	9.83473e-05	-1.77672	6.37678	0.0745827	-0.160083			0.000213995	6.09914e-05	0.000177525	9.83473e-05
rs1519379	intergenic	COL22A1, FAM135B	8	139518938	T/C	0.16	0.171233	0.570255	7.76995e-05	0.534029	4.43823e-05	-61.9078	-37.5522	0.927329	0.532494			0.570255	7.76995e-05	0.534029	4.43823e-05
rs10966220	intergenic	IZUMO3, ELAVL2	9	24113158	A/G	0.25	0.222603	0.704227	7.69658e-05	0.713097	0.000107027	0.917949	-1.9575	-0.0254175	0.325454			0.704227	7.69658e-05	0.713097	0.000107027
rs10812027	intergenic	IZUMO3, ELAVL2	9	24113936	T/C	0.25	0.222603	0.704227	7.69658e-05	0.713097	0.000107027	0.296248	-8.99137	0.00961395	0.334077			0.704227	7.69658e-05	0.713097	0.000107027
rs7093996	intronic	ZCCHC24	10	81147278	G/T	0.24	0.287671	0.00028541	2.53637e-05	0.000312451	4.05568e-05	11.9917	-7.93732	-0.307307	0.268374			0.00028541	2.53637e-05	0.000312451	4.05568e-05
rs10886170	intergenic	GHITM, NRG3	10	85091864	A/G	0.26	0.188356	0.495666	7.95046e-05	0.596673	5.99363e-05	-9.24452	-4.98022	0.0838688	0.0327668			0.495666	7.95046e-05	0.596673	5.99363e-05
rs10886214	intergenic	GHITM, NRG3	10	85127739	C/T	0.26	0.188356	6.55137e-05	7.95046e-05	5.66656e-05	5.99363e-05	-69.9824	86.9073	1.11732	-1.40022			6.55137e-05	7.95046e-05	5.66656e-05	5.99363e-05
rs11244854	intronic	ADAM12	10	127850629	C/T	0.31	0.277397	0.00142435	0.000248245	0.000604178	8.82998e-05	-11.6637	29.6657	0.285819	-0.637972			0.00142435	0.000248245	0.000604178	8.82998e-05
rs1674927	intronic	ADAM12	10	127852395	C/T	0.3	0.270548	0.00131036	0.000258933	0.000567189	9.04901e-05	30.1603	-14.8631	-0.0968174	-0.121097			0.00131036	0.000258933	0.000567189	9.04901e-05
rs7106553	intronic	OR51B5	11	5491568	A/G	0.35	0.369863	0.000227607	0.127843	9.50232e-05	0.104685	26.7983	7.83296	-0.39534	-0.256725			0.000227607	0.127843	9.50232e-05	0.104685
rs12790049	intronic	PKNOX2	11	125048088	C/T	0.34	0.335616	2.70288e-05	0.000717125	2.97519e-05	0.000582218	27.9644	-5.98593	-0.499125	0.0553286			2.70288e-05	0.000717125	2.97519e-05	0.000582218
rs10770203	intergenic	PIK3C2G, LMO3	12	17383662	A/G	0.17	0.212329	0.97401	5.10717e-05	0.83643	0.000240429	17.2361	-74.6836	-0.297696	1.31903			0.97401	5.10717e-05	0.83643	0.000240429
rs12811916	intergenic	LMNTD1, KRAS	12	25550866	T/C	0.17	0.205479	0.357564	6.80254e-05	0.356378	3.90465e-05	3.15598	NA	0.139313	NA			0.357564	6.80254e-05	0.356378	3.90465e-05
rs7981309	intronic	STARD13	13	33730226	T/C	0.2	0.143836	8.40403e-05	0.660712	6.35579e-05	0.519382	18.1062	6.13355	-0.395879	-0.172964			8.40403e-05	0.660712	6.35579e-05	0.519382
rs7337547	intergenic	SPRYD7, KPNA3	13	50443527	G/T	0.056	0.0582192	8.00086e-05	0.0579498	0.000275655	NA	-48.0642	22.9275	0.410039	NA			8.00086e-05	0.0579498	0.000275655	NA
rs11617754	intronic	SPRYD7	13	50501980	G/A	0.11	0.0924658	8.0427e-05	0.0622603	0.000309016	NA	73.6645	-75.4279	-1.23141	1.25832			8.0427e-05	0.0622603	0.000309016	NA
rs9805613	intergenic	SLITRK6	13	86982353	A/G	0.071	0.0547945	5.21068e-06	0.496664	6.61021e-06	NA	39.4577	41.2148	-0.686657	-0.832575			5.21068e-06	0.496664	6.61021e-06	NA
rs9302073	intergenic	SLITRK6	13	87002553	C/T	0.045	0.0787671	NA	3.22112e-05	NA	2.37928e-05	16.9543	2.79115	-0.468225	0.0694429			NA	3.22112e-05	NA	2.37928e-05
rs9524925	intergenic	CLDN10, ABCC4	13	95989190	A/G	0.44	0.400685	3.95365e-05	0.12336	3.42185e-05	0.148054	42.5034	13.7689	-0.695821	-0.133742			3.95365e-05	0.12336	3.42185e-05	0.148054
rs9518206	intronic	NALCN-AS1	13	101562964	T/C	0.13	0.14726	0.332424	2.63645e-05	0.470668	1.84965e-05	-14.8974	-45.2971	0.352534	0.944705			0.332424	2.63645e-05	0.470668	1.84965e-05
rs8021103	intronic	LOC105370510	14	56177363	G/T	0.26	0.160959	4.88819e-05	4.6337e-05	2.06471e-05	3.18559e-05	29.2177	-8.57814	-0.487321	0.215842			4.88819e-05	4.6337e-05	2.06471e-05	3.18559e-05
rs10498477	intronic	LOC105370510	14	56180099	G/A	0.26	0.160959	4.88819e-05	4.6337e-05	2.06471e-05	3.18559e-05	20.153	6.00398	-0.423914	-0.0152823			4.88819e-05	4.6337e-05	2.06471e-05	3.18559e-05
rs2134919	intergenic	EXOC5, OTX2	14	57412758	C/T	0.22	0.188356	2.30198e-05	1.16154e-05	2.44844e-05	1.64136e-05	26.0613	-34.2955	-0.580344	0.758133			2.30198e-05	1.16154e-05	2.44844e-05	1.64136e-05
rs6573129	intergenic	EXOC5, OTX2	14	57648321	T/C	0.076	0.0821918	0.593973	8.27342e-05	0.398953	6.88558e-05	-48.1293	-41.7087	0.691744	0.594065			0.593973	8.27342e-05	0.398953	6.88558e-05
rs7158266	intergenic	EXOC5, OTX2	14	57648751	T/G	0.076	0.0821918	0.593973	8.27342e-05	0.398953	6.88558e-05	-48.1293	-41.7087	0.691744	0.594065			0.593973	8.27342e-05	0.398953	6.88558e-05
rs10136042	intergenic	EXOC5, OTX2	14	57665761	C/A	0.13	0.136986	0.000116909	1.20896e-05	4.03112e-05	3.00017e-06	-11.874	11.4051	0.145334	-0.214429			0.000116909	1.20896e-05	4.03112e-05	3.00017e-06
rs10135064	intergenic	EXOC5	14	57668859	T/G	0.13	0.136986	0.251499	1.20896e-05	0.205264	3.00017e-06	-142.07	-139.683	2.24244	2.26286			0.251499	1.20896e-05	0.205264	3.00017e-06
rs3742578	missense, 3' UTR	EXOC5	14	57672715	C/T	0.13	0.14726	7.87277e-05	1.48628e-05	2.82265e-05	3.64945e-06	-2.43418	-39.3339	-0.0195515	0.653764			7.87277e-05	1.48628e-05	2.82265e-05	3.64945e-06
rs7141911	3' UTR	EXOC5	14	57672871	A/G	0.13	0.14726	0.379508	1.48628e-05	0.302362	3.64945e-06	-41.7681	-39.3339	0.634212	0.653764			0.379508	1.48628e-05	0.302362	3.64945e-06
rs1957516	intronic	EML1	14	100208990	G/A	0.16	0.119863	0.000113416	5.07219e-05	6.57272e-05	3.22492e-05	38.43	-46.4983	-0.680485	0.76659			0.000113416	5.07219e-05	6.57272e-05	3.22492e-05
rs160964	intergenic	CNTNAP4, TERF2IP	16	76077294	T/G	0.28	0.277397	0.0182169	8.76602e-05	0.0352106	0.000103722	-32.3774	-35.9869	0.621882	0.554469			0.0182169	8.76602e-05	0.0352106	0.000103722
rs6501293	intronic	AMZ2	17	66219163	G/A	0.12	0.126712	NA	1.0238e-05	NA	8.55014e-06	-45.8833	37.1206	0.22736	NA			NA	1.0238e-05	NA	8.55014e-06
rs2952278	intronic	PRKAR1A	17	66479216	A/G	0.27	0.294521	0.606802	5.08537e-05	0.544406	2.40072e-05	25.5354	-2811.79	-0.394555	39.5571			0.606802	5.08537e-05	0.544406	2.40072e-05
rs352823	intergenic	LOC107985340	19	49759494	T/C	0.2	0.171233	7.58803e-05	0.972867	5.43864e-05	0.736987	-17.6257	-13.1312	0.285484	0.239383			7.58803e-05	0.972867	5.43864e-05	0.736987
rs198480	intergenic	CTNNBL1, BLCAP	20	36280827	T/C	NA	0.181507	0.450678	9.98641e-05	0.354588	4.11361e-05	1.72383	4.24656	-0.0411922	-0.144852			0.450678	9.98641e-05	0.354588	4.11361e-05
rs1928630	intergenic	CTNNBL1, BLCAP	20	36286035	C/T	0.14	0.178082	0.000170952	4.42198e-05	8.85297e-05	1.98358e-05	-6.65975	4.30669	0.15069	-0.140457			0.000170952	4.42198e-05	8.85297e-05	1.98358e-05
rs876523	intronic	PTPRT	20	40728095	A/G	0.31	0.315068	0.904912	4.93423e-05	0.91667	1.01449e-05	-21.7971	-13.3091	0.291859	0.107112			0.904912	4.93423e-05	0.91667	1.01449e-05
rs9784225	intronic	SYN3	22	33001950	C/T	0.29	0.243151	0.000813958	0.000159573	0.000453187	7.95107e-05	10.0607	-36.6549	-0.192488	0.664191			0.000813958	0.000159573	0.000453187	7.95107e-05
rs5769708	intergenic	NA	22	49365633	C/A	0.17	0.181507	5.48188e-05	0.000226501	5.3607e-05	0.000263284	-2.88426	23.9817	-0.018131	-0.42304			5.48188e-05	0.000226501	5.3607e-05	0.000263284
rs5970424	intronic, 3' UTR	PNMA3	X	152227132	C/T	0.16	0.10274	0.000113177	0.000442238	6.49628e-05	0.000379215	-17.1419	-26.7934	0.178425	0.517028			0.000113177	0.000442238	6.49628e-05	0.000379215

## Sheet: Supplemental Table 9
Gene Symbol	Gencode Id	SNP	FDR	p	Effect Size	T-Statistic	Standard Error	Tissue
PADI2	ENSG00000117115.8	rs2235910	5.70451e-06	2.8e-101	0.67	33	0.02	Whole Blood
PADI2	ENSG00000117115.8	rs737428	1.1409e-05	3.8e-85	0.67	28	0.024	Whole Blood
PADI2	ENSG00000117115.8	rs2014725	1.71135e-05	9.5e-78	0.63	26	0.024	Whole Blood
PADI2	ENSG00000117115.8	rs2235910	2.2818e-05	2.4e-29	0.59	13	0.046	Lung
PADI2	ENSG00000117115.8	rs2014725	2.85225e-05	9.4e-26	0.57	12	0.048	Lung
PADI2	ENSG00000117115.8	rs737428	3.4227e-05	4.7e-25	0.59	12	0.05	Lung
PADI2	ENSG00000117115.8	rs2235910	3.99315e-05	2.2e-20	0.68	13	0.052	Spleen
PADI2	ENSG00000117115.8	rs737428	4.56361e-05	7.2e-18	0.72	12	0.061	Spleen
PADI2	ENSG00000117115.8	rs2235910	5.13406e-05	5.7e-15	0.65	8.7	0.075	Heart - Left Ventricle
PADI2	ENSG00000117115.8	rs2014725	5.70451e-05	8.3e-15	0.63	9.9	0.064	Spleen
PADI2	ENSG00000117115.8	rs737428	6.27496e-05	4e-14	0.64	8.3	0.077	Heart - Left Ventricle
PADI2	ENSG00000117115.8	rs2014725	6.84541e-05	1.8e-13	0.6	8.1	0.075	Heart - Left Ventricle
PADI2	ENSG00000117115.8	rs2014725	7.41586e-05	5.9e-07	0.35	5.1	0.068	Adipose - Subcutaneous
PADI2	ENSG00000117115.8	rs2235910	7.98631e-05	3.3e-06	0.32	4.8	0.068	Adipose - Subcutaneous
PADI2	ENSG00000117115.8	rs737428	8.55676e-05	7.3e-06	0.33	4.6	0.071	Adipose - Subcutaneous
PADI2	ENSG00000117115.8	rs737428	9.12721e-05	7.9e-06	0.36	4.6	0.079	Artery - Aorta
PADI2	ENSG00000117115.8	rs2235910	9.69766e-05	8.5e-06	0.35	4.6	0.077	Artery - Aorta
PADI2	ENSG00000117115.8	rs2235910	0.000102681	1.4e-05	0.28	4.4	0.063	Thyroid
RWDD3	ENSG00000122481.12	rs4950044	0.000108386	2e-05	-0.27	-4.4	0.061	Adipose - Visceral (Omentum)
RWDD3	ENSG00000122481.12	rs6683355	0.00011409	2.5e-05	-0.25	-4.3	0.059	Adipose - Visceral (Omentum)
RWDD3	ENSG00000122481.12	rs4949959	0.000119795	2.8e-05	-0.25	-4.3	0.059	Adipose - Visceral (Omentum)
PADI2	ENSG00000117115.8	rs2014725	0.000125499	3.4e-05	0.27	4.2	0.063	Thyroid
PADI2	ENSG00000117115.8	rs737428	0.000131204	4.3e-05	0.27	4.2	0.065	Thyroid
PADI2	ENSG00000117115.8	rs2235910	0.000136908	4.8e-05	0.4	4.3	0.093	Cells - EBV-transformed lymphocytes
PADI2	ENSG00000117115.8	rs2235910	0.000142613	5.1e-05	0.52	4.3	0.12	Liver
PADI2	ENSG00000117115.8	rs2014725	0.000148317	7e-05	0.32	4.1	0.078	Artery - Aorta
PADI2	ENSG00000117115.8	rs737428	0.000154022	8.5e-05	0.38	4.1	0.093	Heart - Atrial Appendage
PADI2	ENSG00000117115.8	rs737428	0.000159726	9e-05	0.41	4.1	0.1	Cells - EBV-transformed lymphocytes
PADI2	ENSG00000117115.8	rs2235910	0.000165431	0.00011	0.26	4	0.066	Esophagus - Mucosa
PADI2	ENSG00000117115.8	rs2235910	0.000171135	0.00011	0.36	4	0.091	Heart - Atrial Appendage
AQP4-AS1	ENSG00000260372.2	rs232358	2.7248e-05	1e-06	-0.93	-5.4	0.17	Brain - Nucleus accumbens (basal ganglia)
AQP4-AS1	ENSG00000260372.2	rs1181704	5.44959e-05	1e-06	-0.93	-5.4	0.17	Brain - Nucleus accumbens (basal ganglia)
AQP4-AS1	ENSG00000260372.2	rs380625	8.17439e-05	1e-06	-0.93	-5.4	0.17	Brain - Nucleus accumbens (basal ganglia)
KLF6	ENSG00000067082.10	rs7906433	0.000108992	7.5e-05	-0.38	-4.2	0.091	Brain - Caudate (basal ganglia)
